# Supplementary material
Source: PubMed Central journal article supplement (PMC9245195)
Supplement: NIHMS1808669-supplement-Supplemental_Publication_Material.pdf [file NIHMS1808669-supplement-Supplemental_Publication_Material.pdf]

SUPPLEMENTAL MATERIAL

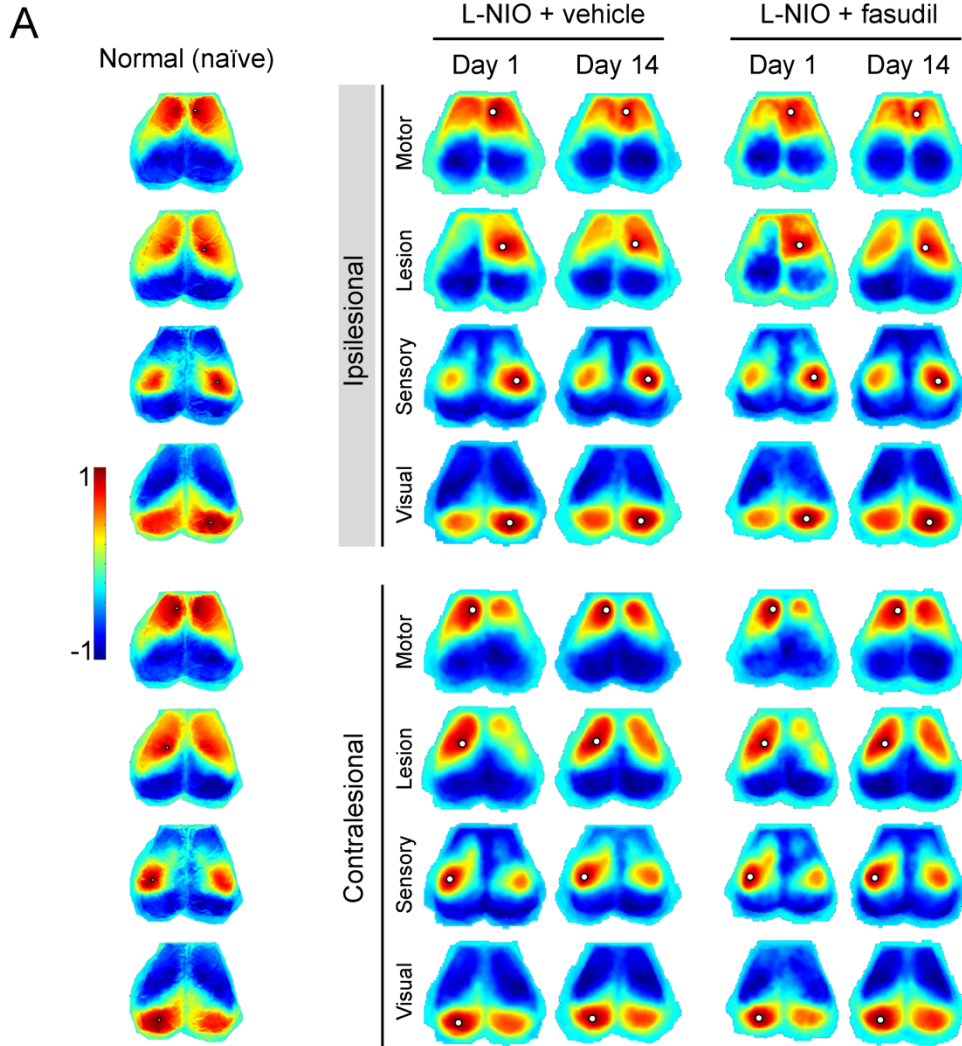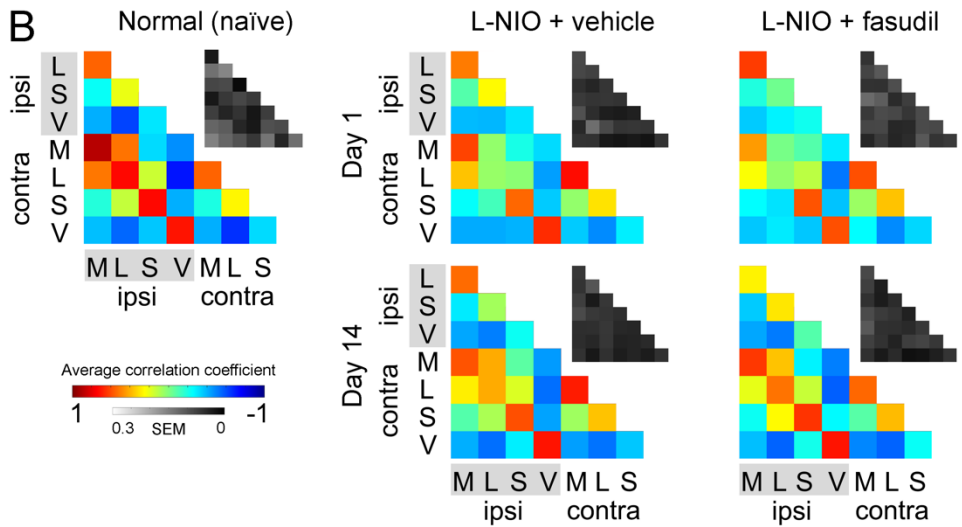

**Supplemental Figure I: Seed-based connectivity maps and correlation matrices.**

(A) Average resting state functional connectivity maps in mice with skull preparation only (left), and 1 or 14 days after L-NIO injection and vehicle (middle) or fasudil treatment (right). (B) Average connectivity coefficients among the eight seeds (color matrix and scale bar) are shown along with the absolute value of their standard error (grayscale matrix and scale bar). These spatial analyses were exploratory and not intended for statistical comparisons.
